# Supplementary material for: Impact of Diabetic Stress Conditions on Renal Cell Metabolome
Source: MDPI journal article supplement (doi:10.3390/cells8101141), 2019-09-24
Supplement: s1 [file s1]

# Impact of diabetic stress conditions on renal cell metabolome – Supplementary material

**Simon Lagies<sup>1,2,3\*</sup>, Roman Pichler<sup>4\*</sup>, Tillmann Bork<sup>4</sup>, Michael M. Kaminski<sup>4</sup>, Kevin Troendle<sup>5</sup>, Stefan Zimmermann<sup>5</sup>, Tobias B. Huber<sup>6</sup>, Gerd Walz<sup>4,7</sup>, Soeren S. Lienkamp<sup>4,7,8</sup>, Bernd Kammerer<sup>1,7\*</sup>**

<sup>1</sup> Center for Biological Systems Analysis (ZBSA), Albert-Ludwigs-University Freiburg, Habsburgerstr. 49, 79104 Freiburg, Germany

<sup>2</sup> Spemann Graduate School of Biology and Medicine (SGBM), University of Freiburg, Albertstr. 19a, 79104 Freiburg, Germany

<sup>3</sup> Faculty of Biology, University of Freiburg, Schänzlestr. 1, 79104 Freiburg, Germany

<sup>4</sup> Department of Medicine, Renal Division, Medical Center - University of Freiburg, Faculty of Medicine, University of Freiburg, Hugstetter Str. 55, 79106 Freiburg, Germany

<sup>5</sup> Laboratory for MEMS Applications, IMTEK - Department of Microsystems Engineering, University of Freiburg, Georges-Koehler-Allee 103, 79110 Freiburg, Germany

<sup>6</sup> III. Department of Medicine, University Medical Center Hamburg-Eppendorf, 20246 Hamburg, Germany

<sup>7</sup> BIOS Centre of Biological Signalling Studies, University of Freiburg, Schänzlestr. 18, 79104 Freiburg, Germany

<sup>8</sup> Institute of Anatomy, University of Zurich, Winterthurerstr.190, 8057 Zurich, Switzerland

\* Equal contribution

\* Corresponding author:

Prof. Dr. Bernd Kammerer

Email: [bernd.kammerer@zbsa.uni-freiburg.de](mailto:bernd.kammerer@zbsa.uni-freiburg.de)

Center for Biological Systems Analysis

Albert-Ludwigs-University Freiburg

Habsburgerstraße 49

79104 Freiburg i. Br.

Germany

Tel: 0761-203-97137

Fax: 0761-203-97177

Supplementary Table 1: Primers used in this study for qPCR analyses.

| Gene    | Accession number | Sequence |                               | Source |
|---------|------------------|----------|-------------------------------|--------|
| mTBP    | NM_013684        | FP       | 5'-CCCCTTGTACCCTTCACCAAT-3'   | [44]   |
|         |                  | RP       | 5'-GAAGCTGCGGTACAATTCCAG-3'   |        |
| mHk1    | NM_001146100     | FP       | 5'-GAAAGGAGACCAACAGCAGAGC-3'  |        |
|         |                  | RP       | 5'-TTCGTTCCCTCCGAGATCCAAGG-3' |        |
| mSord   | NM_146126        | FP       | 5'-GGATGGTCACTTTGCTTGTGGC-3'  |        |
|         |                  | RP       | 5'-GGTCTCTTTGCCAACCTGGATG-3'  |        |
| mAkr1b3 | NM_009658        | FP       | 5'-GGTGAAAGGAGCCTTCCAGAAG-3'  |        |
|         |                  | RP       | 5'-ATCCAGTGGGAAATAGTCGGGC-3'  |        |
| hHK1    | NM_000188.2      | FP       | 5'-CTGCTGGTGAAAATCCGTAGTGG-3' | [45]   |
|         |                  | RP       | 5'-GTCCAAGAAGTCAGAGATGCAGG-3' |        |
| hAKR1B1 | NM_001628        | FP       | 5'-CCAACTTCAACCATCTCCAGGTG-3' |        |
|         |                  | RP       | 5'-GTCACCACGATGCCTTTGGACT-3'  |        |
| hSORD   | NM_003104        | FP       | 5'-GCCGATACAATCTGTCACCTTCC-3' |        |
|         |                  | RP       | 5'-CGCCTTCCTCAAAGGTGACATTG-3' |        |
| hGAPDH  | NM_001256799.2   | FP       | 5'-GTCTCCTCTGACTTCAACAGCG-3'  | [46]   |
|         |                  | RP       | 5'-ACCACCCTGTTGCTGTAGCCAA-3'  |        |
| hHSPCB  | NM_001271969     | FP       | 5'-CTCTGTCAGAGTATGTTTCTCGC-3' |        |
|         |                  | RP       | 5'-GTTTCCGCACTCGCTCCACAAA-3'  |        |

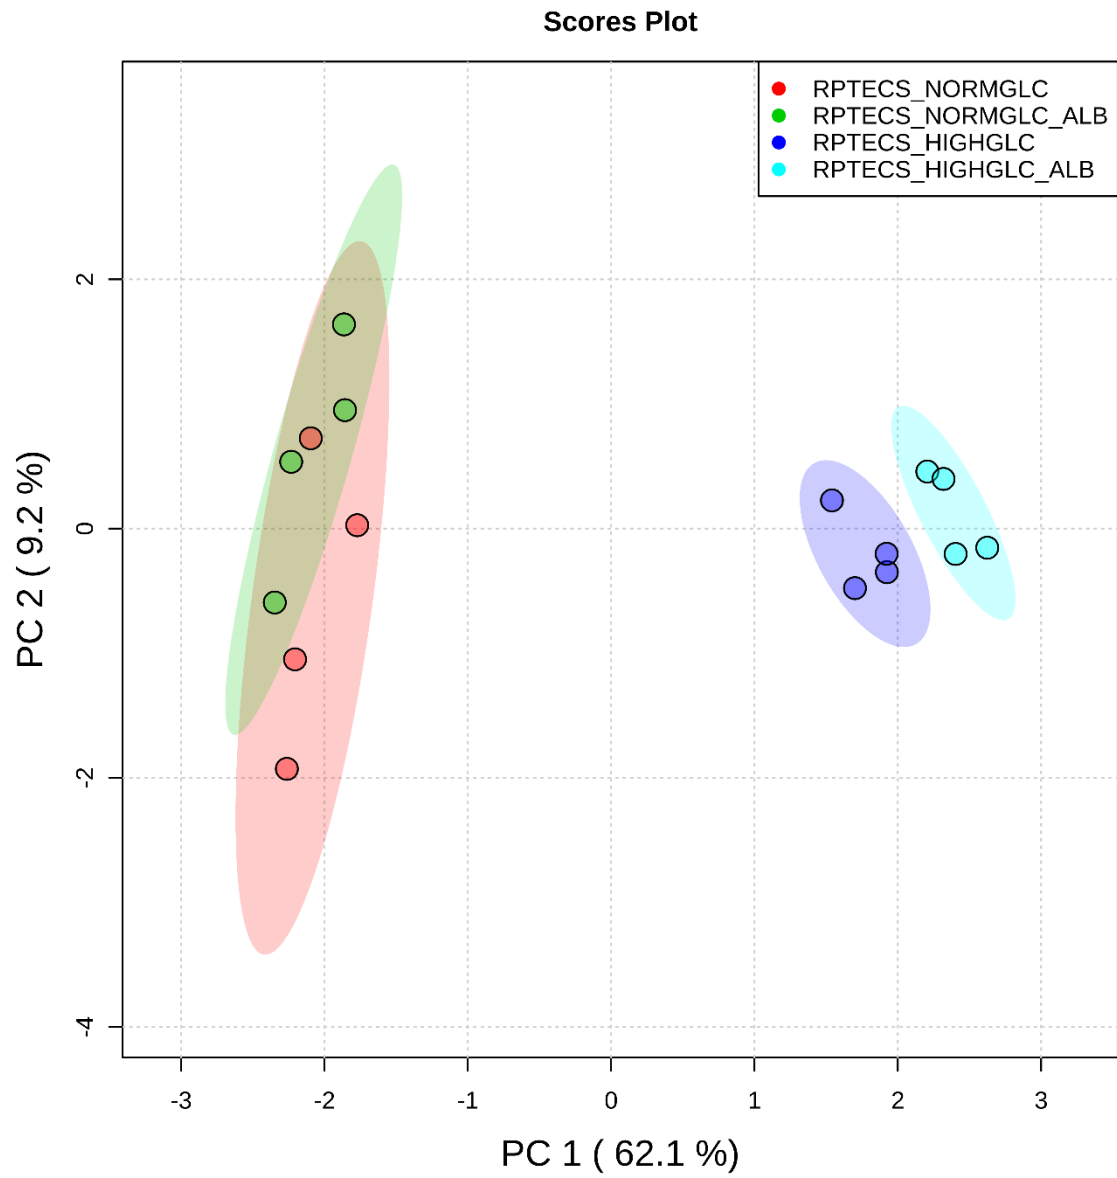

Supplementary Figure 1: Principal component analysis of RPTECs. PC2 reflected the biological variance and was not affected by glucose or albumin concentration.

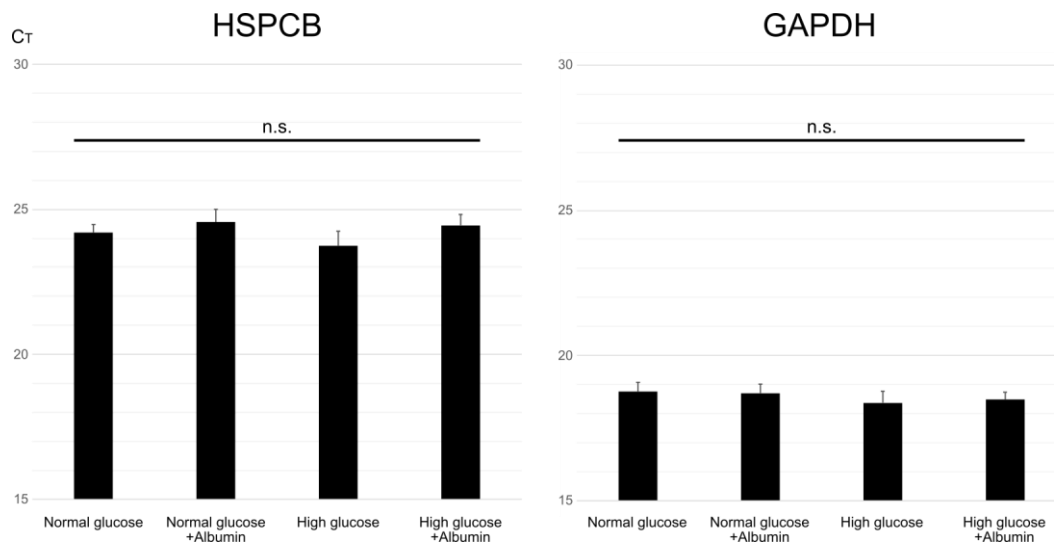

Supplementary Figure 2: Ct values of housekeeping genes used for quantitative RT-PCR in RPTECs. Expression levels of both housekeeping genes used for this study are not dependent on glucose or albumin concentrations. Columns display mean Ct- values of three replicates with 95% confidence interval (error bars). Ct – cycle threshold; HSPCB – heat shock 90kDa protein 1, beta; GAPDH – glyceraldehyde-3-phosphate dehydrogenase; n.s. – not significant.

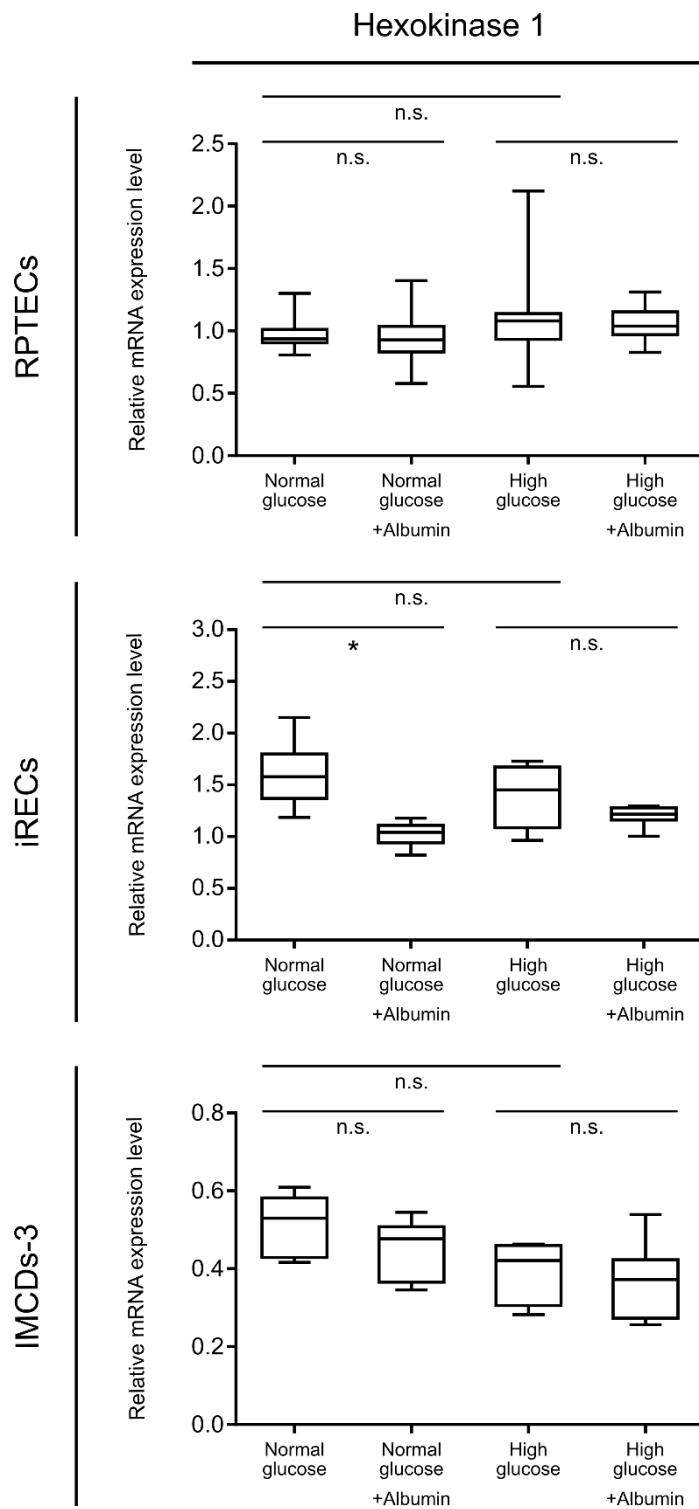

Supplementary Figure 3 : Relative mRNA expression level of hexokinase 1 as detected by qPCR analysis. Comparison between normal and high glucose, high glucose w/wo albumin overload and normal glucose w/wo albumin overload. Data are shown for RPTECs (upper line), iRECs (intermediate line) and IMCD-3 (lower line). Boxplots display mean values of three replicates with 95% confidence interval (whiskers). p-values: n.s. not significant, \* <0.05.

## References

44. Ferreira MJ, McKenna LB, Zhang J, Reichert M, Bakir B, Buza EL et al. Spontaneous Pancreatitis Caused by Tissue-Specific Gene Ablation of Hhex in Mice. *Cell Mol Gastroenterol Hepatol* 2015;1(5):550–69.
45. Hariton F, Xue M, Rabbani N, Fowler M, Thornalley PJ. Sulforaphane Delays Fibroblast Senescence by Curbing Cellular Glucose Uptake, Increased Glycolysis, and Oxidative Damage. *Oxid Med Cell Longev* 2018;2018:5642148.
46. Izumi-Nakaseko H, Kanda Y, Nakamura Y, Hagiwara-Nagasawa M, Wada T, Ando K et al. Development of correction formula for field potential duration of human induced pluripotent stem cell-derived cardiomyocytes sheets. *Journal of Pharmacological Sciences* 2017;135(1):44–50.
